# Supplementary material for: Older People’s Usage Pattern, Satisfaction with Community Facility and Well-Being in Urban Old Districts
Source: MDPI journal article supplement (doi:10.3390/ijerph191610297), 2022-08-18
Supplement: s1 [file s1]

## PART I Usage pattern of community facilities

1. Please indicate the frequency of visiting following community facilities in the past week:

|                            | A (0) | B (1-2) | C (3-5) | D (6-7) | E (>7) |
|----------------------------|-------|---------|---------|---------|--------|
| Commercial facility        |       |         |         |         |        |
| Community service facility |       |         |         |         |        |
| Cultural facility          |       |         |         |         |        |
| Municipal facility         |       |         |         |         |        |
| Leisure facility           |       |         |         |         |        |
| Religious facility         |       |         |         |         |        |

2. Please indicate the time period per visit of following community facilities in the past week:

|                            | A (<15 min) | B (15-30 min) | C (30-60 min) | D (>60 min) |
|----------------------------|-------------|---------------|---------------|-------------|
| Commercial facility        |             |               |               |             |
| Community service facility |             |               |               |             |
| Cultural facility          |             |               |               |             |
| Municipal facility         |             |               |               |             |
| Leisure facility           |             |               |               |             |
| Religious facility         |             |               |               |             |

3. Please indicate your purpose of visiting following community facilities (multi-choices):

|                     | Physical exercise | Learn new knowledge | Social interaction | Basic life needs | Accompany with family and friends | Volunteer work | Entertainment | Others |
|---------------------|-------------------|---------------------|--------------------|------------------|-----------------------------------|----------------|---------------|--------|
| Commercial facility |                   |                     |                    |                  |                                   |                |               |        |



5. Please indicate your satisfaction level with following community facilities.

|                               | Very<br>dissatisfied | Dissatisfied | Fair | Satisfied | Very<br>satisfied |
|-------------------------------|----------------------|--------------|------|-----------|-------------------|
| Commercial facility           |                      |              |      |           |                   |
| Community service<br>facility |                      |              |      |           |                   |
| Cultural facility             |                      |              |      |           |                   |
| Municipal facility            |                      |              |      |           |                   |
| Leisure facility              |                      |              |      |           |                   |
| Religious facility            |                      |              |      |           |                   |

## PART II Planning and design of community facilities

Please rate your agreement with the following statements.

(1. Strongly disagree; 2. Disagree; 3.Fair; 4.Agree; 5. Strongly agree)

|   |                                                                            |   |   |   |   |   |
|---|----------------------------------------------------------------------------|---|---|---|---|---|
| 1 | The size (space) of the community facilities is enough in my neighborhood. |   |   |   |   |   |
|   | Commercial facility                                                        | 1 | 2 | 3 | 4 | 5 |
|   | Community service facility                                                 | 1 | 2 | 3 | 4 | 5 |
|   | Cultural facility                                                          | 1 | 2 | 3 | 4 | 5 |
|   | Municipal facility                                                         | 1 | 2 | 3 | 4 | 5 |
|   | Leisure facility                                                           | 1 | 2 | 3 | 4 | 5 |
|   | Religious facility                                                         | 1 | 2 | 3 | 4 | 5 |
| 2 | The number of community facilities is adequate in my neighborhood.         |   |   |   |   |   |
|   | Commercial facility                                                        | 1 | 2 | 3 | 4 | 5 |
|   | Community service facility                                                 | 1 | 2 | 3 | 4 | 5 |
|   | Cultural facility                                                          | 1 | 2 | 3 | 4 | 5 |
|   | Municipal facility                                                         | 1 | 2 | 3 | 4 | 5 |
|   | Leisure facility                                                           | 1 | 2 | 3 | 4 | 5 |
|   | Religious facility                                                         | 1 | 2 | 3 | 4 | 5 |
| 3 | The community facilities are diversity in my neighborhood.                 |   |   |   |   |   |
|   | Commercial facility                                                        | 1 | 2 | 3 | 4 | 5 |
|   | Community service facility                                                 | 1 | 2 | 3 | 4 | 5 |
|   | Cultural facility                                                          | 1 | 2 | 3 | 4 | 5 |
|   | Municipal facility                                                         | 1 | 2 | 3 | 4 | 5 |
|   | Leisure facility                                                           | 1 | 2 | 3 | 4 | 5 |
|   | Religious facility                                                         | 1 | 2 | 3 | 4 | 5 |

|   |                                                                      |   |   |   |   |   |
|---|----------------------------------------------------------------------|---|---|---|---|---|
| 4 | The community facilities are proximity to my home.                   |   |   |   |   |   |
|   | Commercial facility                                                  | 1 | 2 | 3 | 4 | 5 |
|   | Community service facility                                           | 1 | 2 | 3 | 4 | 5 |
|   | Cultural facility                                                    | 1 | 2 | 3 | 4 | 5 |
|   | Municipal facility                                                   | 1 | 2 | 3 | 4 | 5 |
|   | Leisure facility                                                     | 1 | 2 | 3 | 4 | 5 |
|   | Religious facility                                                   | 1 | 2 | 3 | 4 | 5 |
| 5 | The community facilities are proximity to public transport stations. |   |   |   |   |   |
|   | Commercial facility                                                  | 1 | 2 | 3 | 4 | 5 |
|   | Community service facility                                           | 1 | 2 | 3 | 4 | 5 |
|   | Cultural facility                                                    | 1 | 2 | 3 | 4 | 5 |
|   | Municipal facility                                                   | 1 | 2 | 3 | 4 | 5 |
|   | Leisure facility                                                     | 1 | 2 | 3 | 4 | 5 |
|   | Religious facility                                                   | 1 | 2 | 3 | 4 | 5 |
| 6 | The community facilities are proximity to other amenities.           |   |   |   |   |   |
|   | Commercial facility                                                  | 1 | 2 | 3 | 4 | 5 |
|   | Community service facility                                           | 1 | 2 | 3 | 4 | 5 |
|   | Cultural facility                                                    | 1 | 2 | 3 | 4 | 5 |
|   | Municipal facility                                                   | 1 | 2 | 3 | 4 | 5 |
|   | Leisure facility                                                     | 1 | 2 | 3 | 4 | 5 |
|   | Religious facility                                                   | 1 | 2 | 3 | 4 | 5 |

### PART III Well-being

#### Physical well-being

1. Can you walk 360 m? (one sports field)

☐ No difficulty    ☐ Some difficulty    ☐ Can do it with help    ☐ Unable

2. Do you have any chronic illness(es)?

☐ Yes    ☐ No

3. Do you have any illness that limits your social activities participation?

☐ Yes    ☐ No

4. Do you have any illness that limits your ability to take care of yourself?

☐ Yes    ☐ No

### Psychological well-being

(1. Strongly disagree; 2. Disagree; 3.Fair; 4.Agree; 5. Strongly agree)

|   |                                                                                   |   |   |   |   |   |
|---|-----------------------------------------------------------------------------------|---|---|---|---|---|
| 1 | In the last one week, I have felt cheerful and have been in good spirits.         | 1 | 2 | 3 | 4 | 5 |
| 2 | In the last one week, I have felt calm and relaxed.                               | 1 | 2 | 3 | 4 | 5 |
| 3 | In the last one week, I have felt active and vigorous.                            | 1 | 2 | 3 | 4 | 5 |
| 4 | In the last one week, I have woken up feeling fresh and well-rested.              | 1 | 2 | 3 | 4 | 5 |
| 5 | In the last one week, my daily life has been filled with things that interest me. | 1 | 2 | 3 | 4 | 5 |

### PART IV Personal information

Gender: ☐Male ☐Female

Age: ☐55-60 ☐61-70 ☐71-80 ☐81-90 ☐>90

Education: ☐Primary school or lower ☐Secondary school  
☐Post-secondary ☐Graduate school or higher

Which TPU you lived in?

☐255 ☐260 ☐261 ☐262 ☐263 ☐264 ☐265 ☐266 ☐267  
☐268 ☐269 ☐280 ☐290 ☐291 ☐292 ☐293 ☐294 ☐297  
☐298
